# Vitamin D 1 $\alpha$ -Hydroxylase Gene Mutations in Patients with 1 $\alpha$ -Hydroxylase Deficiency

Chan Jong Kim,\* Larry E. Kaplan,\* Farzana Perwad, Ningwu Huang, Amita Sharma, Yong Choi, Walter L. Miller, and Anthony A. Portale

Department of Pediatrics (C.J.K., L.E.K., F.P., N.H., W.L.M., A.A.P.), University of California, San Francisco, San Francisco, California 94143; Pediatric Nephrology (A.S.), MassGeneral Hospital for Children, Massachusetts General Hospital and Harvard School of Medicine, Boston, Massachusetts 02114; and Department of Pediatrics (Y.C.), Seoul National University Children's Hospital, Seoul 110-744, Korea

**Context:** Vitamin D 1 $\alpha$ -hydroxylase deficiency, also known as vitamin D-dependent rickets type 1, is an autosomal recessive disorder characterized by the early onset of rickets with hypocalcemia and is caused by mutations of the 25-hydroxyvitamin D 1 $\alpha$ -hydroxylase (1 $\alpha$ -hydroxylase, *CYP27B1*) gene. The human gene encoding the 1 $\alpha$ -hydroxylase is 5 kb in length, located on chromosome 12, and comprises nine exons and eight introns. We previously isolated the human 1 $\alpha$ -hydroxylase cDNA and gene and identified 19 different mutations in 25 patients with 1 $\alpha$ -hydroxylase deficiency.

**Objectives, Patients, and Methods:** We analyzed the 1 $\alpha$ -hydroxylase gene of 10 patients, five from Korea, two from the United States, and one each from Argentina, Denmark, and Morocco, all from non-consanguineous families. Each had clinical and radiographic features of rickets, hypocalcemia, and low serum concentrations of 1,25-dihydroxyvitamin D<sub>3</sub>.

**Results:** Direct sequencing identified the responsible 1 $\alpha$ -hydroxylase gene mutations in 19 of 20 alleles. Four novel and four known mutations were identified. The new mutations included a nonsense mutation in exon 6, substitution of adenine for guanine (2561G→A) creating a stop signal at codon 328; deletion of adenine in exon 9 (3922delA) causing a frameshift; substitution of thymine for cytosine in exon 2 (1031C→T) causing the amino acid change P112L; and a splice site mutation, substitution of adenine for guanine in the first nucleotide of intron 7 (IVS7+1 G→A) causing a frameshift.

**Conclusions:** Mutations in the 1 $\alpha$ -hydroxylase gene previously were identified in 44 patients, to which we add 10 more. The studies show a strong correlation between 1 $\alpha$ -hydroxylase mutations and the clinical findings of 1 $\alpha$ -hydroxylase deficiency. (*J Clin Endocrinol Metab* 92: 3177–3182, 2007)

VITAMIN D IS PRESENT in two forms, ergocalciferol (vitamin D<sub>2</sub>) produced by plants and cholecalciferol (vitamin D<sub>3</sub>) produced by animal tissues or by the action of UV light on 7-dehydrocholesterol in human skin. Both forms of vitamin D are biologically inactive prohormones that must undergo sequential hydroxylations in the liver and the kidney before they can bind to and activate the vitamin D receptor (1, 2). The hormonally active form of vitamin D, 1,25-dihydroxyvitamin D<sub>3</sub> [1,25(OH)<sub>2</sub>D], plays a critical role in calcium and phosphate metabolism, bone growth, and cellular differentiation. Renal synthesis of 1,25(OH)<sub>2</sub>D from its endogenous precursor, 25-hydroxyvitamin D (25OHD), is the rate-limiting, hormonally regulated step in the bioactivation of vitamin D and is catalyzed by the mitochondrial cytochrome P450 enzyme, 25OHD-1 $\alpha$ -hydroxylase (1 $\alpha$ -hydroxylase, P450c1 $\alpha$ ) (3, 4). 1 $\alpha$ -Hydroxylation occurs primarily in the kidney, although other tissues such as epidermal keratinocytes, macrophages, and osteoblasts express enzyme activity. Renal 1 $\alpha$ -hydroxylase activity is tightly regulated by PTH, calcium, phosphorus, and 1,25(OH)<sub>2</sub>D itself.

Vitamin D 1 $\alpha$ -hydroxylase deficiency, also referred to as vitamin D-dependent rickets type I (VDDR-I) or pseudovitamin D deficiency rickets, is an autosomal recessive disorder characterized clinically by hypotonia, muscle weakness, growth failure, hypocalcemic seizures in early infancy, and radiographic findings of rickets (5–7). Characteristic laboratory features are hypocalcemia, increased serum concentrations of PTH, and low or undetectable serum concentrations of 1,25(OH)<sub>2</sub>D despite normal or increased concentrations of 25OHD. Physiological doses of 1 $\alpha$ (OH) vitamin D<sub>3</sub> (1 $\alpha$ -OHD) or 1,25(OH)<sub>2</sub>D<sub>3</sub> induce remission of the clinical and laboratory abnormalities (5). We (8), as have others (9–12), cloned the cDNA encoding 1 $\alpha$ -hydroxylase, cloned the full-length human gene (*CYP27B1*) (13), and demonstrated that VDDR-I is caused by mutations of this gene (8), identifying 19 different mutations in 25 patients from multiple ethnic backgrounds (8, 14, 15). Others have identified 13 other mutations (16–20); the 32 different mutations described to date include missense mutations, deletions, duplications, and splice site mutations. We now report 1 $\alpha$ -hydroxylase mutations in 10 patients with clinical, laboratory, and radiographic features of 1 $\alpha$ -hydroxylase deficiency.

## Patients and Methods

### Patients

We analyzed DNA from 10 unrelated patients from nonconsanguineous families with the clinical diagnosis of 1 $\alpha$ -hydroxylase deficiency; patients numbered 1–5 were from Korea, and patients 6–9 were Cau-

First Published Online May 8, 2007

\* C.J.K. and L.E.K. contributed equally to this work.

Abbreviations: 1,25(OH)<sub>2</sub>D, 1,25-Dihydroxyvitamin D<sub>3</sub>; 25OHD, 25-hydroxyvitamin D; 1 $\alpha$ -OHD, 1 $\alpha$ (OH) vitamin D<sub>3</sub>; VDDR-I, vitamin D-dependent rickets type I.

JCEM is published monthly by The Endocrine Society (<http://www.endo-society.org>), the foremost professional society serving the endocrine community.

casians from Morocco, United States, Argentina, and Denmark, respectively, and patient 10 was African-American. Specimens from the parents and siblings of some of the patients also were analyzed. This study was approved by the Committee on Human Research, University of California, San Francisco. The clinical data for these patients are summarized in Table 1.

Patient 1 presented with bowing of the legs at 12 months of age. He had a prominent forehead with craniotabes, rachitic rosary, genu varus, and enlargement of the wrists and ankles. Laboratory data revealed hypocalcemia, high serum alkaline phosphatase and PTH concentrations, and radiographic features of rickets. With initial treatment with high doses of ergocalciferol, the serum 25OHD concentration was increased, whereas that of 1,25(OH)<sub>2</sub>D was low. Subsequent treatment with 1 $\alpha$ -OHD resulted in improvement of clinical, radiographic, and laboratory abnormalities.

Patient 2 developed recurrent seizures at 5 months of age. At 15 months of age, she was found to have kyphosis, prominent rachitic rosary, a widely open anterior fontanel, varus deformity of the elbow, and x-ray findings of severe rickets with fractures of both fibulae. Laboratory data revealed hypocalcemia, high serum alkaline phosphatase and PTH concentrations, and low 1,25(OH)<sub>2</sub>D concentration. She was successfully treated with 1 $\alpha$ -OHD.

Patient 3 presented with a hypocalcemic seizure at 5 months of age. At 25 months of age, she was found to have a prominent forehead, rachitic rosary, and bowing of the legs. Laboratory evaluation showed hypocalcemia, high serum alkaline phosphatase activity, and low 1,25(OH)<sub>2</sub>D concentration. Radiographs revealed features of severe rickets. She responded well to 1 $\alpha$ -OHD.

Patient 4 presented with a femur fracture after minor trauma at the age of 14 months. He had hypocalcemia, high alkaline phosphatase activity, low 1,25(OH)<sub>2</sub>D concentration, and rachitic changes on x-ray. Administration of 1 $\alpha$ -OHD resulted in normalization of clinical, radiographic, and laboratory abnormalities.

Patient 5 presented with a hypocalcemic seizure at 5 months of age and was treated with calcium and vitamin D. At 17 months of age, he was noted to have rachitic rosary, prominent forehead, and enlargement of wrists and ankles. Laboratory data revealed hypocalcemia, high serum alkaline phosphatase concentration, and rachitic changes on x-ray. Serum concentration of 25OHD was above the normal range, whereas that of 1,25(OH)<sub>2</sub>D was not detectable. He responded well to administration of 1 $\alpha$ -OHD.

Patient 6 presented with severe malnutrition, hypotonia, and respiratory distress at 22 months of age. Physical and x-ray examinations revealed findings consistent with severe rickets and pneumonia with pleural effusion. Laboratory examination showed hypocalcemia, hypophosphatemia, and high concentrations of alkaline phosphatase and

PTH. Serum 25OHD concentration was within the normal range, whereas that of 1,25(OH)<sub>2</sub>D was low. He developed bilateral pneumothoraces and multiple organ failure and died.

Patient 7 presented with rachitic rosary, genu varus, and fractures of the midregion of both ulnae, left tibia, and femur (four fracture sites) at 12 months of age. Laboratory examination showed normal serum calcium concentration, hypophosphatemia, high alkaline phosphatase and PTH concentrations, high normal 25OHD concentration, undetectable 1,25(OH)<sub>2</sub>D concentration, and generalized aminoaciduria. He initially was treated with sodium citrate and citric acid solution, phosphate supplements, and calcitriol with good response. Renal ultrasound performed after 8 months of therapy showed nephrocalcinosis. He remains on treatment with calcitriol.

Patient 8 presented with seizures and hypocalcemia at 2 months of age. He was treated with calcium, diphenylhydantoin, and phenobarbital. At 3 months of age, x-rays of the wrists showed severe rickets. He had hypocalcemia, high serum alkaline phosphatase and PTH concentrations, normal 25OHD and low 1,25(OH)<sub>2</sub>D concentrations, and x-ray findings of severe rickets. With administration of calcitriol, the clinical, radiographic, and laboratory abnormalities became normal.

Patient 9 presented with delayed motor development and was found to have Harrison's grooves and delayed bone development, prompting the clinical diagnosis of rickets at the age of 10 months. Laboratory data revealed hypocalcemia, normophosphatemia, high alkaline phosphatase and PTH concentrations, normal 25(OH)D concentration, and low 1,25(OH)<sub>2</sub>D concentration. She was successfully treated with calcium and 1 $\alpha$ -OHD.

Patient 10, an African-American female, was evaluated for clinical signs of rickets at 12 months of age. Serum calcium was low, and 1,25(OH)<sub>2</sub>D was not detectable. She responded well to treatment with calcitriol.

#### PCR amplification and sequence analysis of 1 $\alpha$ -hydroxylase gene

Genomic DNA was extracted from leukocytes, and the human 1 $\alpha$ -hydroxylase gene was amplified by PCR as previously described (14). PCR products were purified through QIAquick PCR purification columns (QIAGEN, Valencia, CA) and sequenced directly using an automated ABI PRISM 3700 sequencer (PerkinElmer Corp., Foster City, CA). The primers used for DNA sequencing of patients 1–5 were as previously described (14) except for exons 7 and 8, for which the following primers were used: exon 7, sense, 5'-ACTAGTGGATGGAAG-CAGGGA-3', and antisense, 5'-GGTCAAGGGGAGTGTGTTT-GAAG-3'; and exon 8, sense, 5'-TTCAAACACTCCCTTGACC-3', and antisense, 5'-CAGGGGAAAGAGCTCACAAC-3'. The primers used for DNA sequencing of patients 6–10 are shown in Table 2. Putative mutations were

**TABLE 1.** Clinical and laboratory findings in 10 patients with 1 $\alpha$ -hydroxylase deficiency

| Patient no.             | Location      | Age at diagnosis (months) | Clinical presentation                  | Serum concentration |                |                |                   |                  |                                 | Mutation no. |
|-------------------------|---------------|---------------------------|----------------------------------------|---------------------|----------------|----------------|-------------------|------------------|---------------------------------|--------------|
|                         |               |                           |                                        | Ca (mmol/liter)     | P (mmol/liter) | ALP (IU/liter) | PTH (IU/liter)    | 25OHD (ng/ml)    | 1,25(OH) <sub>2</sub> D (pg/ml) |              |
| 1                       | Korea         | 12                        | Bowed legs                             | 2.1                 | 0.8            | 1050           | 560 <sup>b</sup>  | 336 <sup>a</sup> | <7                              | 1/1          |
| 2                       | Korea         | 5                         | Seizures                               | 1.6                 | 1.0            | 2043           | 1320 <sup>b</sup> | 27               | 9                               | 2/2          |
| 3                       | Korea         | 5                         | Seizure                                | 1.4                 | 2.0            | 6665           | 750 <sup>b</sup>  | 38               | <5                              | 1/2          |
| 4                       | Korea         | 14                        | Femur fracture                         | 1.8                 | 1.6            | 1437           | 340 <sup>c</sup>  | 16               | <5                              | 1/2          |
| 5                       | Korea         | 5                         | Seizure                                | 1.5                 | 1.2            | 1326           | 750 <sup>b</sup>  | 77               | <4                              | 1/3          |
| 6                       | Morocco       | 22                        | Severe rickets                         | 1.3                 | 0.8            | 957            | 198 <sup>c</sup>  | 42               | 6                               | 4/4          |
| 7                       | United States | 12                        | Rachitic rosary, fractures, bowed legs | 2.5                 | 0.6            | 3952           | 874 <sup>c</sup>  | 49               | <5                              | 5/5          |
| 8                       | Argentina     | 2                         | Seizures, hypocalcemia, rickets        | 1.9                 | 1.4            | 2477           | 164 <sup>c</sup>  | 19               | 11                              | 6/7          |
| 9                       | Denmark       | 10                        | Rachitic rosary                        | 1.7                 | 1.2            | 6507           | 1.58 <sup>d</sup> | 37               | <5                              | 7/?          |
| 10                      | United States | 12                        | Rickets                                | Low                 | NA             | NA             | NA                | NA               | <10                             | 8/8          |
| Normal pediatric ranges |               |                           |                                        | 2.2–2.7             | 1.4–2.0        | 80–260         |                   | 15–60            | 20–80                           |              |

To convert the values for 25OHD to nmol/liter, multiply by 2.5; to convert the values for 1,25(OH)<sub>2</sub>D to pmol/liter, multiply by 2.4. ALP, Alkaline phosphatase; NA, not available.

<sup>a</sup> During treatment with cholecalciferol.

<sup>b–d</sup> PTH normal ranges: <sup>b</sup> 150–450 pg/ml; <sup>c</sup> 10–65 pg/ml; <sup>d</sup> 0.22–0.5  $\mu$ g/liter.

**TABLE 2.** Oligonucleotide primers used for PCR amplification and sequencing of the *CYP27B1* gene in patients 6–10

| Exon | Sense primer           | Antisense primer           | Size (bp) |
|------|------------------------|----------------------------|-----------|
| 1    | ACCACTCAGGAGGAGGGATG   | CTTATTTTCATGGGCATCCGTT     | 450       |
| 2    | AGAAGCTCCCTATTCCCAAGC  | TAGAGTGGGACAGCCGACCTC      | 409       |
| 3    | CAGGTTTCCGTACCCCAAGG   | GGATGAAGGTCTCCGTGTCG       | 500       |
| 4    | TACAAGTTCGGACTGGAAGGTG | AGACTCCAGGTCTTCTCGG        | 466       |
| 5    | AGACTGGGACCAGATGTTTGC  | CTAAGCCAAGCTGGTCTACGTG     | 398       |
| 6    | GACCAGCTTGGCTTAGCACC   | TTTTGGCCAGGAGTAGAGGG       | 393       |
| 7    | AAAATGGCCCTCTACTCCTGG  | GTCAGGGGAGTGTTTGAAGG       | 298       |
| 8    | GGAGATCCTTCCAAAAGTAGCC | GCCTATAATGGGCTTATCATATTTAG | 482       |
| 9    | CCACCCAATCATTGACCATT   | TTTGGTCAGATAGGCATTAGGG     | 343       |

confirmed twice by PCR amplification and sequencing of the affected exon directly from genomic DNA of the patients and their parents. Nucleotides are numbered from the experimentally determined transcriptional start site as described (13); the reference sequence is GenBank accession no. AF 027152.

Results

Clinical characteristics

The diagnosis of 1 $\alpha$ -hydroxylase deficiency was made in each of the 10 patients based on their clinical features and laboratory findings; the parents and siblings were asymptomatic. The 10 patients showed symptoms within the first 22 months of life, and their physical findings included rachitic rosary, genu varus or valgus, metaphyseal widening, and frontal bossing (Table 1). All patients had radiographic signs of active rickets. Laboratory testing revealed hypocalcemia, increased serum concentrations of alkaline phosphatase and PTH, normal or increased serum concentrations of 25OHD, and greatly reduced concentrations of 1,25(OH)<sub>2</sub>D. Patients responded well to treatment with 1 $\alpha$ -OHD or calcitriol.

Mutations in the 1 $\alpha$ -hydroxylase gene

To determine whether patients with the clinical syndrome of 1 $\alpha$ -hydroxylase deficiency had mutations in the 1 $\alpha$ -hydroxylase gene, we analyzed genomic DNA extracted from leukocytes. We found mutations in the 1 $\alpha$ -hydroxylase gene on both alleles in nine of the 10 patients. Patient 1 was homozygous for a splice site mutation, substitution of an adenine for a guanine in the first nucleotide of intron 3 (IVS3 + 1 G→A). This mutation, reported previously in a Japanese patient (18), disrupts the splice donor site, resulting in retention of intron 3. The retained intron would create a frameshift after codon 196 and a translational termination signal 63 bp downstream from the end of exon 3, resulting in a severely

truncated protein that cannot have enzymatic activity. Patient 2 was homozygous for a seven-nucleotide insertion in exon 8; this previously reported mutation alters the reading frame downstream of codon 442 and creates a premature TGA stop signal at codon 446 (14). Patients 3 and 4 were compound heterozygous for the two mutations detected in patients 1 and 2. Patient 5 was compound heterozygous for the mutation detected in patient 1, IVS3 + 1 G→A, and for a novel nonsense mutation, 2561G→A, in exon 6 that creates a premature TAG stop signal at codon 328. Patient 6 was homozygous for a novel deletion in exon 9, 3922delA. This frameshift mutation bypasses the termination signal normally found at codon 509 (TAG), permitting translation into the 3' untranslated region of the gene to reach a TAA stop signal 92 bp downstream. Patient 7 was homozygous for a deletion in exon 2, 958delG, a known frameshift mutation that results in a severely truncated protein. We previously showed that 958delG is the founder mutation observed in French Canadian patients originating from the Charlevoix-Saguenay-Lac Saint Jean region of Quebec, in which the prevalence of 1 $\alpha$ -hydroxylase deficiency is unusually high (14, 17). Patient 8 was heterozygous for a novel missense mutation in exon 2, 1031C→T, causing the amino acid change proline (P)112 to leucine (L), and a known missense mutation in exon 7, 2947G→A, causing the amino acid change arginine (R) 389 to histidine (H) (14, 15). Patient 9 was heterozygous for the same novel missense mutation identified in patient 8, 2947G→A (R389H); however, we were unable to detect a second mutation in this patient. Patient 10 was homozygous for the novel missense mutation 2998G→A, resulting in the splice donor site mutation IVS7 + 1 G→A.

Analysis of the family members showed that the asymptomatic parents and the brother of patient 1 were heterozygous for the IVS3 + 1 G→A mutation. The mother and the

**TABLE 3.** Mutation numbers

| No. | Nucleotide change <sup>a</sup> | Amino acid change     | Location |
|-----|--------------------------------|-----------------------|----------|
| 1   | IVS3+1 G→A (1796G→A)           | Frameshift after 196E | Intron 3 |
| 2   | 3398–3406insCCCACCC            | Frameshift after 441H | Exon 8   |
| 3   | 2561G→A                        | W328X                 | Exon 6   |
| 4   | 3922delA                       | Frameshift after 498E | Exon 9   |
| 5   | 958delG                        | Frameshift after 87Y  | Exon 2   |
| 6   | 1031C→T                        | P112 L                | Exon 2   |
| 7   | 2947G→A                        | R389H                 | Exon 7   |
| 8   | IVS7+1 G→A (2997G→A)           | Frameshift after 405N | Intron 7 |

<sup>a</sup> Nucleotide numbers refer to genomic DNA and are numbered from the transcription start site (13). The reference sequence is available on the NCBI, Entrez, Nucleotide database (<http://www.ncbi.nlm.nih.gov/Entrez>; accession no. AF 027152).

**TABLE 4.** Known mutations of *CYP27B1* in patients with vitamin D 1 $\alpha$ -hydroxylase deficiency

| Nucleotide change <sup>a</sup>       | Amino acid change     | Exon     | Ref.                       |
|--------------------------------------|-----------------------|----------|----------------------------|
| Missense mutations                   |                       |          |                            |
| 246G→T                               | Q65H                  | 1        | 14                         |
| 1016G→A                              | R107H                 | 2        | 16, 18                     |
| 1031C→T                              | P112 L                | 2        | This study                 |
| 1070G→A                              | G125E                 | 2        | 16                         |
| 1634C→T                              | P143 L                | 3        | 18                         |
| 1696G→A                              | D164N                 | 3        | 18                         |
| 1772A→G                              | E189G                 | 3        | 15                         |
| 1771G→A                              | E189K                 | 3        | 14                         |
| 2337C→G                              | T321R                 | 5        | 18                         |
| 2546C→A                              | S323Y                 | 6        | 19                         |
| 2582G→C                              | R335P                 | 6        | 16                         |
| 2605C→T                              | L343F                 | 6        | 15                         |
| 2925C→T                              | P382S                 | 7        | 16                         |
| 2946C→T                              | R389C                 | 7        | 18                         |
| 2946C→G                              | R389G                 | 7        | 15                         |
| 2947G→A                              | R389H                 | 7        | 14, 15, and this study     |
| 3299C→T                              | T409I                 | 8        | 14, 15                     |
| 3359G→C                              | R429P                 | 8        | 14                         |
| 3430C→T                              | R453C                 | 8        | 14                         |
| 3680T→G                              | V478G                 | 9        | 19                         |
| 3917C→G                              | P497R                 | 9        | 14                         |
| Nonsense mutations                   |                       |          |                            |
| 2014G→A                              | W241X                 | 4        | 14                         |
| 2561G→A                              | W328X                 | 6        | This study                 |
| 3372G→A                              | W433X                 | 8        | 18                         |
| Deletions                            |                       |          |                            |
| 212delG                              | Frameshift from 55K   | 1        | 14                         |
| 958delG                              | Frameshift from 87Y   | 2        | 14, 17, and this study     |
| 1921delG                             | Frameshift after 209C | 4        | 8, 14                      |
| 1984delC                             | Frameshift after 230V | 4        | 8, 14                      |
| 3922delA                             | Frameshift after 498E | 9        | This study                 |
| Insertions                           |                       |          |                            |
| 3398–3406insCCCACCC                  | Frameshift after 441H | 8        | 14, 17, 19, and this study |
| 3398–3408insCCCACACCC                | Frameshift after 441H | 8        | 14                         |
| Deletion-insertion                   |                       |          |                            |
| 897–901delGGGCG;<br>897–902insCTTCGG | Frameshift after 66V  | 2        | 15                         |
| Splice-site mutations                |                       |          |                            |
| IVS2+1 G to A<br>(1083G→A)           | Frameshift after 129A | Intron 2 | 15                         |
| IVS3+1 G to A<br>(1796G→A)           | Frameshift after 196E | Intron 3 | 18 and this study          |
| IVS6+1 G to A<br>(2715G→T)           | Frameshift after 379R | Intron 6 | 20                         |
| IVS7+1 G to A<br>(G2997G→A)          | Frameshift after 405N | Intron 7 | This study                 |

<sup>a</sup> Nucleotide numbers refer to genomic DNA and are numbered from the transcription start site (13). The reference sequence is available on the NCBI, Entrez, Nucleotide database (<http://www.ncbi.nlm.nih.gov/Entrez>; accession no. AF 027152).

brother of patient 2 were heterozygous for the seven-nucleotide insertion in exon 8; DNA from the father was not available for study. The mother of patient 3 was heterozygous for IVS3 + 1 G→A, and the father and sister were heterozygous for the seven-nucleotide insertion in exon 8. The mother of patient 4 was heterozygous for the seven-nucleotide insertion in exon 8; the father was not studied. The mother and brother of patient 5 were heterozygous for the IVS3 + 1 G→A, and the father was heterozygous for the 2651G→A mutation in exon 6. The father and mother of patient 6 were both heterozygous for the deletion 3922delA in exon 9. Both parents of patient 9 were heterozygous for 2947G→A in exon 7. DNA from the parents of patients 7, 8, and 10 was not available for analysis. A distant cousin of patient 7 was a compound heterozygote for the missense

mutation R389H in exon 7, which was devoid of enzyme activity when expressed *in vitro*, and for the deletion 958delG in exon 2, which leads to a premature stop (Table 3, patient 2 of Ref. 14).

Discussion

1,25(OH)<sub>2</sub>D is the most potent metabolite of vitamin D and mediates its hormonal actions through the vitamin D receptor. 1,25(OH)<sub>2</sub>D is synthesized from 25OHD by 25OHD-1 $\alpha$ -hydroxylase, a mitochondrial (type I) cytochrome P450 enzyme that functions as an oxidase, using electrons from reduced nicotinamide adenine dinucleotide phosphate and molecular oxygen. The P450 moiety binds the substrate, receives electrons and molecular oxygen, and catalyzes the



reaction using the iron of the heme group to coordinate oxygen (21). The cloning of the 1 $\alpha$ -hydroxylase gene after a long effort (8–13) has permitted determination of the molecular genetic basis of vitamin D 1 $\alpha$ -hydroxylase deficiency. To date, a total of 36 mutations in the 1 $\alpha$ -hydroxylase gene have been identified in 54 patients (108 alleles) with 1 $\alpha$ -hydroxylase deficiency, including those in the present report (Table 4). All but one of the frameshift and premature translation-arrest mutations described eliminate the heme-binding site of P450c1 $\alpha$ ; hence, the resultant protein cannot have 1 $\alpha$ -hydroxylase activity.

Two mutations described in *CYP27B1* are relatively more common than the others. Deletion of guanine 958 (958delG), as numbered from the gene's transcriptional start site (13), was found on 20 French Canadian alleles (14, 17); microsatellite haplotype analysis showed that these arose from a single founder (14, 22). A seven-nucleotide duplication/insertion in exon 8 was found in 14 affected alleles (14, 17, 19); these arose from various ethnic groups with different microsatellite haplotypes (14).

We have now shown that the splice site mutation, IVS3 + 1 G→A also is common, occurring in five of 10 Korean alleles. Guanine to adenine substitution in the first nucleotide of an intron is a common mutation in many genes and usually results in skipping of the 5'-exon or activation of potential splice sites (23). However, in short introns, retention of the intron may also occur (23), as has been demonstrated for IVS3 + 1 G→A in the 1 $\alpha$ -hydroxylase (18). The retention of intron 3 causes altered translation and a premature stop codon 63 bp downstream from the end of exon 3. The resulting truncated 1 $\alpha$ -hydroxylase would have only 197 of 508 amino acids, would lack the heme-binding domain, and hence would have no enzyme activity. Two other splice site mutations have been reported in the 1 $\alpha$ -hydroxylase gene: IVS2 + 1 G→A and IVS6 + 1 G→A (15, 20). We now have identified a fourth splice site mutation, IVS7 + 1 G→A.

The 1 $\alpha$ -hydroxylase gene contains the normally duplicated sequence 5'-CCCACCC CCCACCC-3' in exon 8, which encodes residues 438–442 (Pro-Thr-Pro-His-Pro). In the present report, we found triplication rather than duplication of this seven-nucleotide sequence on four alleles. This seven-nucleotide insertion alters the reading frame after codon 441 and creates a premature TGA stop signal 25 codons downstream; this disrupts the heme-binding domain; hence, the resulting truncated protein is devoid of activity (14). We previously reported that six families of widely divergent ethnic backgrounds (Filipino, Polish, Chinese, Caucasian-American, African-American, and Hispanic) carried this seven-nucleotide insertion in association with four different microsatellite haplotypes (14). Thus, the ethnic and haplotype diversity associated with the seven-nucleotide insertion suggests that it has risen by several independent *de novo* events, probably as the result of a slipped-strand mispairing mechanism during meiosis (24). Kitanaka *et al.* (18) found 10 different 1 $\alpha$ -hydroxylase gene mutations in 20 Japanese alleles, suggesting that there is no founder effect in that ethnic group. By contrast, we found only three different mutations in ten Korean alleles, suggesting that in this ethnic group, the genetic defect in the 1 $\alpha$ -hydroxylase gene is more homogeneous.

The novel missense mutation identified in patient 6, Pro 112 to Leu, immediately precedes the B'  $\alpha$ -helix, which comprises residues 113–118 (14). Changing this residue from Pro to Leu is predicted to reorient dramatically the direction of the C $\alpha$  carbon peptide backbone, disrupting the sterol-binding pocket of the enzyme. The resultant protein is predicted to be devoid of enzymatic activity.

## Acknowledgments

We thank the following physicians for providing DNA samples and clinical data on their patients: Dr. Encarna Guillen Navarro, Hospital Universitario Virgen de la Arrixaca, Murcia, Spain (patient 6); Dr. Michael Linshaw, Massachusetts General Hospital, Boston, Massachusetts (patient 7); Dr. Christina Tau, Hospital de Pediatria J. P. Garrahan, Buenos Aires, Argentina (patient 8); Dr. Troels Ring, Aalborg Hospital, Aalborg, Denmark (patient 9); and Dr. Norman Bell, Ralph H. Johnson Medical Center, Charleston, South Carolina (patient 10). We thank Ms. Izabella Damm for assistance with DNA sequencing.

Received December 5, 2006. Accepted May 2, 2007.

Address all correspondence and requests for reprints to: Anthony A. Portale, M.D., University of California, San Francisco, 533 Parnassus Avenue, Box 0748, Room U-585, San Francisco, California 94143-0748. E-mail: aportal@peds.ucsf.edu.

This work was supported by National Institutes of Health Grant DK 37922 (to W.L.M.), grants from the March of Dimes Birth Defects Foundation (to A.A.P.), and gifts from the David Carmel Trust (to A.A.P.). C.J.K. was supported in part by Chonnam National University Medical School, Gwangju, Korea.

Present address for C.J.K.: Department of Pediatrics, Chonnam National University Medical School, Gwangju, Korea.

Disclosure Statement: All authors have nothing to declare.

## References

1. Miller WL, Portale AA 2000 Vitamin D 1 $\alpha$ -hydroxylase. *Trends Endocrinol Metab* 11:315–319
2. Portale AA, Miller WL 2003 Rickets due to hereditary abnormalities of vitamin D synthesis or action. In: Glorieux FH, Pettifor JM, Juppner H, eds. *Pediatric bone*. San Diego: Academic Press; 583–598
3. Fraser DR, Kodicek E 1970 Unique biosynthesis by kidney of a biologically active vitamin D metabolite. *Nature* 228:764–766
4. Brunette MG, Chan M, Ferriere C, Roberts KD 1978 Site of 1,25(OH)<sub>2</sub> vitamin D<sub>3</sub> synthesis in the kidney. *Nature* 276:287–289
5. Fraser D, Kooh SW, Kind HP, Holick MF, Tanaka Y, DeLuca HF 1973 Pathogenesis of hereditary vitamin-D-dependent rickets. An inborn error of vitamin D metabolism involving defective conversion of 25-hydroxyvitamin D to 1 $\alpha$ ,25-dihydroxyvitamin D. *N Engl J Med* 289:817–822
6. Scriver CR, Reade TM, DeLuca HF, Hamstra AJ 1978 Serum 1,25-dihydroxyvitamin D levels in normal subjects and in patients with hereditary rickets or bone disease. *N Engl J Med* 299:976–979
7. Delvin EE, Glorieux FH, Marie PJ, Pettifor JM 1981 Vitamin D dependency: replacement therapy with calcitriol. *J Pediatr* 99:26–34
8. Fu GK, Lin D, Zhang MYH, Bikle DD, Miller WL, Portale AA 1997 Cloning of human 25-hydroxyvitamin D-1 $\alpha$ -hydroxylase and mutations causing vitamin D-dependent rickets type 1. *Mol Endocrinol* 11:1961–1970
9. Shinki T, Shimada H, Wakino S, Anazawa H, Hayashi M, Saruta T, DeLuca HF, Suda T 1997 Cloning and expression of rat 25-hydroxyvitamin D<sub>3</sub>-1 $\alpha$ -hydroxylase cDNA. *Proc Natl Acad Sci USA* 94:12920–12925
10. St-Arnaud R, Messerlian S, Moir JM, Omdahl JL, Glorieux FH 1997 The 25-hydroxyvitamin D 1 $\alpha$ -hydroxylase gene maps to the pseudovitamin D-deficiency rickets (PDDR) disease locus. *J Bone Miner Res* 12:1552–1559
11. Takeyama K, Kitanaka S, Sato T, Kobori M, Yanagisawa J, Kato S 1997 25-Hydroxyvitamin D<sub>3</sub> 1 $\alpha$ -hydroxylase and vitamin D synthesis. *Science* 277:1827–1830
12. Monkawa T, Yoshida T, Wakino S, Shinki T, Anazawa H, DeLuca HF, Suda T, Hayashi M, Saruta T 1997 Molecular cloning of cDNA and genomic DNA for human 25-hydroxyvitamin D<sub>3</sub> 1 $\alpha$ -hydroxylase. *Biochem Biophys Res Commun* 239:527–533
13. Fu GK, Portale AA, Miller WL 1997 Complete structure of the human gene for the vitamin D 1 $\alpha$ -hydroxylase, P450c1 $\alpha$ . *DNA Cell Biol* 16:1499–1507
14. Wang JT, Lin CJ, Burrige SM, Fu GK, Labuda M, Portale AA, Miller WL 1998 Genetics of vitamin D 1 $\alpha$ -hydroxylase deficiency in 17 families. *Am J Hum Genet* 63:1694–1702
15. Wang X, Zhang MYH, Miller WL, Portale AA 2002 Novel gene mutations in

- patients with 1 $\alpha$ -hydroxylase deficiency that confer partial enzyme activity *in vitro*. J Clin Endocrinol Metab 87:2424–2430
16. Kitanaka S, Takeyama K, Murayama A, Sato T, Okumura K, Nogami M, Hasegawa Y, Nimi H, Yanagisawa J, Tanaka T, Kato S 1998 Inactivating mutations in the 25-hydroxyvitamin D<sub>3</sub> 1 $\alpha$ -hydroxylase gene in patients with pseudovitamin D-deficiency rickets. N Engl J Med 338:653–661
  17. Yoshida T, Monkawa T, Tenenhouse HS, Goodyer P, Shinki T, Suda T, Wakino S, Hayashi M, Saruta T 1998 Two novel 1 $\alpha$ -hydroxylase mutations in French-Canadians with vitamin D dependency rickets type 1. Kidney Int 54:1437–1443
  18. Kitanaka S, Murayama A, Sakaki T, Inouye K, Seino Y, Fukumoto S, Shima M, Yukizane S, Takayanagi M, Niimi H, Takeyama K, Kato S 1999 No enzyme activity of 25-hydroxyvitamin D<sub>3</sub> 1 $\alpha$ -hydroxylase gene product in pseudovitamin D deficiency rickets, including that with mild clinical manifestation. J Clin Endocrinol Metab 84:4111–4117
  19. Smith SJ, Rucka AK, Berry JL, Davies M, Mylchreest S, Paterson CR, Heath DA, Tassabehji M, Read AP, Mee AP, Mawer EB 1999 Novel mutations in the 1 $\alpha$ -hydroxylase (P450c1) gene in three families with pseudovitamin D-deficiency rickets resulting in loss of functional enzyme activity in blood-derived macrophages. J Bone Miner Res 14:730–739
  20. Porcu L, Meloni A, Casula L, Asunis I, Marini MG, Cao A, Moi P 2002 A novel splicing defect (IVS6+1G→T) in a patient with pseudovitamin D deficiency rickets. J Endocrinol Invest 25:557–560
  21. Miller WL 2005 Regulation of steroidogenesis by electron transfer. Endocrinology 146:2544–2550
  22. Labuda M, Labuda D, Korab-Laskowska M, Cole DE, Zietkiewicz E, Weissenbach J, Popowska E, Pronicka E, Root AW, Glorieux FH 1996 Linkage disequilibrium analysis in young populations: pseudo-vitamin D-deficiency rickets and the founder effect in French Canadians. Am J Hum Genet 59:633–643
  23. Cooper DN, Krawczak M, Antonaratis SE 1995 The nature and mechanism of human gene mutation. In: Scriver CR, Beaudet AL, Sly WS, Valle D, eds. The metabolic and molecular bases of inherited disease. New York: McGraw-Hill; 259–291
  24. Levinson G, Gutman GA 1987 Slipped-strand mispairing: a major mechanism for DNA sequence evolution. Mol Biol Evol 4:203–221

JCEM is published monthly by The Endocrine Society (<http://www.endo-society.org>), the foremost professional society serving the endocrine community.
